# Supplementary material
Source: MDPI journal article supplement (https://www.mdpi.com/2073-4395/12/2/392)
Supplement: s1 [file s1]

Supplementary Table S1. Climate trend in 2018. Weeekly data from Vite.net Horta S.r.l.

| Week       | T<br>mean<br>(°C) | Relative<br>humidity<br>(%) | Leaf<br>wetness/week<br>(h) | Rain<br>events/week | Rain week<br>(mm) | Leaves<br>development | BBCH |
|------------|-------------------|-----------------------------|-----------------------------|---------------------|-------------------|-----------------------|------|
| 01/03/2018 | 6.3               | 90.1                        | 21.3                        | 6                   | 72.4              | -                     | -    |
| 08/03/2018 | 10.7              | 80.1                        | 17.3                        | 3                   | 49.6              | -                     | -    |
| 15/03/2018 | 7.5               | 81.4                        | 18.4                        | 6                   | 66                | -                     | -    |
| 22/03/2018 | 7.3               | 59.9                        | 2.0                         | 0                   | 0                 | -                     | -    |
| 29/03/2018 | 12.6              | 68.6                        | 7.1                         | 3                   | 59.3              | -                     | -    |
| 05/04/2018 | 13.1              | 72.7                        | 9.1                         | 4                   | 19.1              | -                     | -    |
| 12/04/2018 | 15.2              | 64.3                        | 2.4                         | 1                   | 1.5               | 1                     | -    |
| 19/04/2018 | 17.8              | 56.9                        | 0.0                         | 0                   | 0                 | 2                     | 53   |
| 26/04/2018 | 17.2              | 68.3                        | 5.4                         | 3                   | 31.3              | 7                     | 55   |
| 03/05/2018 | 17.3              | 76.4                        | 14.0                        | 4                   | 10.4              | 9                     | 56   |
| 10/05/2018 | 15.2              | 78.9                        | 13.6                        | 4                   | 17.6              | 12                    | 59   |
| 17/05/2018 | 16.7              | 76.9                        | 14.0                        | 4                   | 43.9              | 13                    | 61   |
| 24/05/2018 | 21.3              | 74.9                        | 8.3                         | 1                   | 1.3               | 15                    | 65   |
| 31/05/2018 | 20.6              | 72.4                        | 7.9                         | 1                   | 1.5               | 18                    | 70   |
| 07/06/2018 | 21.1              | 74.9                        | 11.1                        | 2                   | 13.3              | 20                    | 73   |
| 14/06/2018 | 21.8              | 64.3                        | 4.6                         | 1                   | 6                 | 0                     | 76   |
| 21/06/2018 | 20.9              | 59.3                        | 2.7                         | 0                   | 0                 | 0                     | 78   |
| 28/06/2018 | 23.6              | 62.6                        | 1.6                         | 0                   | 0                 | 0                     | 78   |
| 05/07/2018 | 24.4              | 63.7                        | 3.4                         | 0                   | 0                 | 0                     | 80   |
| 12/07/2018 | 24.5              | 64.9                        | 4.4                         | 2                   | 18.8              | 0                     | 81   |
| 19/07/2018 | 24.1              | 65.3                        | 2.0                         | 2                   | 7.3               | 0                     | 82   |
| 26/07/2018 | 26.3              | 64.7                        | 2.7                         | 0                   | 0                 | 0                     | 84   |
| 02/08/2018 | 26.6              | 64.3                        | 4.3                         | 1                   | 11.5              | 0                     | 87   |
| 09/08/2018 | 24.1              | 69.0                        | 8.1                         | 2                   | 47.3              | 0                     | 89   |
| 16/08/2018 | 24.0              | 63.7                        | 2.7                         | 1                   | 4.5               | 0                     | 90   |
| 23/08/2018 | 21.4              | 66.4                        | 6.4                         | 2                   | 15.8              | 0                     | 90   |
| 30/08/2018 | 20.2              | 76.3                        | 11.9                        | 3                   | 8.8               | 0                     | 90   |

Supplementary Table S2. Climate trend in 2019. Highlights, starting from the top: average temperature; hours of leaf wetness, mm of rain.

| Week       | T<br>mean<br>(°C) | Relative<br>humidity<br>(%) | Leaf wetness/week<br>(h) | Rain<br>events/week | Rain week<br>(mm) | Shoot<br>development<br>(N. of leaves) | BBCH |
|------------|-------------------|-----------------------------|--------------------------|---------------------|-------------------|----------------------------------------|------|
| 01/03/2019 | 10.7              | 69.3                        | 5.4                      | 0                   | 0                 | 0                                      | -    |
| 08/03/2019 | 9.3               | 66.7                        | 6.1                      | 2                   | 6.8               | 0                                      | -    |
| 15/03/2019 | 10.6              | 69.9                        | 3.7                      | 1                   | 3.5               | 0                                      | -    |
| 22/03/2019 | 11.2              | 53.6                        | 1.4                      | 0                   | 0                 | 0                                      | -    |
| 29/03/2019 | 11.9              | 62.7                        | 5.0                      | 2                   | 26.8              | 0                                      | -    |
| 05/04/2019 | 10.1              | 79.0                        | 10.6                     | 4                   | 25.1              | 0                                      | -    |

|            |      |      |      |   |      |    |    |
|------------|------|------|------|---|------|----|----|
| 12/04/2019 | 11.3 | 74.3 | 6.6  | 2 | 1.5  | 0  | -  |
| 19/04/2019 | 15.3 | 68.4 | 5.1  | 2 | 25.8 | 2  | -  |
| 26/04/2019 | 12.5 | 75.6 | 7.1  | 4 | 36.4 | 5  | 54 |
| 03/05/2019 | 12.0 | 76.7 | 10.9 | 4 | 42.3 | 7  | 54 |
| 10/05/2019 | 13.1 | 68.6 | 5.3  | 2 | 5.5  | 7  | 55 |
| 17/05/2019 | 14.5 | 80.1 | 14.0 | 4 | 48.8 | 9  | 56 |
| 24/05/2019 | 16.1 | 82.7 | 15.9 | 5 | 85.7 | 10 | 57 |
| 31/05/2019 | 18.9 | 68.4 | 1.4  | 0 | 0    | 12 | 60 |
| 07/06/2019 | 22.4 | 68.3 | 3.4  | 0 | 0    | 15 | 65 |
| 14/06/2019 | 22.9 | 72.6 | 3.4  | 0 | 0    | 18 | 70 |
| 21/06/2019 | 25.0 | 70.6 | 2.3  | 1 | 1    | 20 | 73 |
| 28/06/2019 | 27.3 | 61.0 | 0.1  | 0 | 0    | -  | 76 |
| 05/07/2019 | 25.1 | 73.6 | 3.1  | 2 | 6.3  | -  | 78 |
| 12/07/2019 | 21.9 | 73.9 | 6.6  | 3 | 19.6 | -  | 79 |
| 19/07/2019 | 26.5 | 68.1 | 0.4  | 0 | 0    | -  | 80 |
| 26/07/2019 | 24.3 | 78.7 | 9.3  | 2 | 91.5 | -  | 81 |
| 02/08/2019 | 24.3 | 73.1 | 2.4  | 0 | 0    | -  | 83 |
| 09/08/2019 | 25.2 | 72.3 | 3.6  | 0 | 0    | -  | 85 |
| 16/08/2019 | 24.5 | 73.1 | 4.4  | 1 | 0.5  | -  | 87 |
| 23/08/2019 | 23.2 | 81.7 | 11.6 | 4 | 47.1 | -  | 90 |
| 30/08/2019 | 21.8 | 77.3 | 8.3  | 1 | 1    | -  | 90 |

Supplementary Table S3. Climate trend in 2020. Highlights, starting from the top: average temperature; hours of leaf wetness, mm of rain.

| Week     | T mean (°C) | Relative humidity (%) | Leaf wetness (h) | Rain events/week | Rain week (mm) | Development leaves | BBCH |
|----------|-------------|-----------------------|------------------|------------------|----------------|--------------------|------|
| 01/03/21 | 8.49        | 83.29                 | 16.00            | 5                | 44.6           | 0                  | -    |
| 08/03/21 | 9.43        | 81.29                 | 9.86             | 0                | 0              | 0                  | -    |
| 15/03/21 | 10.90       | 72.71                 | 5.14             | 0                | 0              | 0                  | -    |
| 22/03/21 | 6.81        | 72.43                 | 7.43             | 1                | 0.5            | 0                  | -    |
| 29/03/21 | 8.20        | 69.29                 | 5.57             | 2                | 6.5            | 0                  | -    |
| 05/04/21 | 13.17       | 59.14                 | 0.00             | 0                | 0              | 0                  | -    |
| 12/04/21 | 12.96       | 70.57                 | 3.71             | 1                | 2.5            | 1                  | -    |
| 19/04/21 | 13.81       | 78.29                 | 8.00             | 2                | 27.9           | 4                  | 53   |
| 26/04/21 | 15.27       | 80.29                 | 10.29            | 3                | 31.5           | 5                  | 53   |
| 03/05/21 | 16.60       | 67.14                 | 3.71             | 0                | 0              | 6                  | 55   |
| 10/05/21 | 18.07       | 75.14                 | 9.00             | 4                | 19.9           | 9                  | 57   |
| 17/05/21 | 18.93       | 70.00                 | 7.71             | 3                | 14.5           | 12                 | 59   |
| 24/05/21 | 17.19       | 60.71                 | 3.00             | 1                | 7              | 14                 | 63   |
| 31/05/21 | 18.23       | 69.71                 | 8.29             | 2                | 28.3           | 16                 | 67   |
| 07/06/21 | 17.54       | 76.86                 | 15.86            | 5                | 30.1           | 18                 | 71   |
| 14/06/21 | 19.33       | 65.43                 | 10.71            | 1                | 8.8            | 20                 | 73   |
| 21/06/21 | 23.23       | 60.43                 | 1.71             | 0                | 0              | 20                 | 75   |

|          |       |       |      |   |      |   |    |
|----------|-------|-------|------|---|------|---|----|
| 28/06/21 | 24.19 | 64.43 | 4.14 | 1 | 1.1  | - | 77 |
| 05/07/21 | 23.87 | 57.43 | 0.71 | 0 | 0    | - | 78 |
| 12/07/21 | 21.57 | 60.14 | 3.86 | 1 | 5.5  | - | 79 |
| 19/07/21 | 23.90 | 65.00 | 4.71 | 1 | 9.2  | - | 80 |
| 26/07/21 | 26.11 | 62.14 | 1.71 | 0 | 0    | - | 82 |
| 02/08/21 | 23.81 | 64.00 | 5.86 | 2 | 18.9 | - | 84 |
| 09/08/21 | 26.36 | 57.43 | 1.00 | 0 | 0    | - | 86 |
| 16/08/21 | 24.47 | 65.71 | 5.14 | 1 | 1.8  | - | 89 |
| 23/08/21 | 24.70 | 66.57 | 5.57 | 0 | 0    | - | 90 |
| 30/08/21 | 19.57 | 73.57 | 9.29 | 2 | 63.4 | - | 90 |
